# Supplementary material
Source: publisher figshare collection journal article supplement (https://tandf.figshare.com/ndownloader/files/17961797)
Supplement: Supplementary file 1 [file 17961797]

Table The distribution of genotypes and the frequency of alleles

| Gene | SNP | Genotype | Number of patients | Frequency (%) | Allele | Allele  Frequency  (%) | *PHWE*-  value |
| --- | --- | --- | --- | --- | --- | --- | --- |
| *CYP2C19* | rs4244285  G > A | GG | 17 | 32.7 | G | 52.9 | 0.698 |
| GA | 21 | 40.4 | A | 47.1 |
| AA | 5 | 27.0 |  |  |
| rs4986893  G > A | GG | 36 | 85.7 | G | 91.7 | 0.152 |
| GA | 5 | 11.9 | A | 8.3 |
| AA | 1 | 2.4 |  |  |
| *ABCC2* | rs717620  C > T | CC | 25 | 61.0 | C | 76.8 | 0.483 |
| CT | 13 | 31.7 | T | 23.2 |
| TT | 3 | 7.3 |  |  |
| rs2273697  G > A | GG | 36 | 83.7 | G | 91.9 | 0.561 |
| GA | 7 | 16.3 | A | 8.1 |
| *ABCG2* | rs2231142  T> C | TT | 26 | 60.5 | T | 75.6 | 0.235 |
| TC | 13 | 30.2 | C | 24.4 |
| CC | 4 | 9.3 |  |  |
